# Supplementary material
Source: MDPI journal article supplement (https://www.mdpi.com/2571-550X/5/4/52)

Simmons et al. Table S1. Stratigraphic description of sediment profiles at Palaeolake Flixton (Depths in cm.)

|             |                                                                                                                                                            |
|-------------|------------------------------------------------------------------------------------------------------------------------------------------------------------|
| Fig. 2      | Lake Flixton Centre (profile D)                                                                                                                            |
| 0 - 195     | Confused stratum. Dry, fully oxidized herbaceous peat.                                                                                                     |
| 195 - 314   | Dark brown detritus mud with abundant remains of aquatic plants, monocotyledons, seeds including <i>Potamogeton</i> and insect remains.                    |
| 314 - 330   | Light brown detritus mud-marl with vegetative remains molluscs and insect remains.                                                                         |
| 330 - 468   | Brown-olive to dark olive marl with vegetative remains, molluscs and insect remains.                                                                       |
| 468 - 499   | Pale olive marl with dense vegetative remains including reed/sedge fragments and insect remains                                                            |
| 499 - 516   | Pale olive to olive silty marl with some vegetative and insect remains.                                                                                    |
| 516 - 534   | Grey-olive clayey marl.                                                                                                                                    |
| 534 - 538   | Grey-olive silty-clayey marl with occasional gravel.                                                                                                       |
| 538 - 545   | Grey-olive silty clay with gravel.                                                                                                                         |
| 545 - 548   | Olive silty-clayey marl with occasional gravel.                                                                                                            |
| 548 - 645   | Pale olive silty marl.                                                                                                                                     |
| 645 - 660   | Olive silty-clayey marl                                                                                                                                    |
| 660 - 670   | Grey-olive silty clay.                                                                                                                                     |
| Fig. 3      | No Name Hill (profile NM)                                                                                                                                  |
| 0 - 70      | Dark brown to black crumbly humified herbaceous peat with wood remains, particularly in the upper 20 cm.                                                   |
| 70 - 116    | Dark brown unhumified <i>Phragmites</i> reed peat.                                                                                                         |
| 116 - 118   | Dark brown <i>Phragmites</i> peat with dense concentrations of mollusc and ostracod remains.                                                               |
| 118 - 138   | Olive marl with aquatic plant remains including <i>Phragmites</i> and <i>Potamogeton</i> seeds, <i>Chara</i> oospores, molluscs and insect remains.        |
| 138 - 153   | Pale olive marl with less dense plant remains including <i>Potamogeton</i> and reed. Contains <i>Chara</i> oospores, molluscs and insect remains.          |
| 153 - 159   | Pale olive slightly sandy marl containing banded aquatic plant remains eg <i>Potamogeton</i> and reed, <i>Chara</i> remains, molluscs and woody fragments. |
| 159 - 161   | Dark grey sand with small gravels towards the base.                                                                                                        |
| 161 - 165   | Grey clay                                                                                                                                                  |
| Fig. 4      | No Name Hill (profile NAQ)                                                                                                                                 |
| 0 - 136     | Confused stratum. Oxidised peat.                                                                                                                           |
| 136 - 172   | Very dark brown crumbly reed peat.                                                                                                                         |
| 172 - 177   | Dark brown organic mud with vegetative reed remains and mollusc remains.                                                                                   |
| 177 - 181   | Brown organic marly mud with some mollusc remains.                                                                                                         |
| 181 - 184.5 | Dark brown organic mud with extensive reed fibres and mollusc remains.                                                                                     |
| 184.5 - 189 | Grey sticky clay with abundant fragments of black slate or manganese.                                                                                      |
| 189 - 204   | Light olive marl with mollusc remains.                                                                                                                     |
| 204 - 208   | Grey organic sand with small angular gravels.                                                                                                              |

Fig. 5 No Name Hill (profile NAZ)

- 0 - 23 Very dark brown crumbly reed peat with abundant *Corylus* remains.
- 23 - 47 Dark brown lake detritus with macro remains of monocotyledons and *Betula* wood.
- 47 - 48 Sticky grey clay layer with slate/manganese fragments.
- 48 - 50 Dark grey sand.

Fig. 6 Flixton Island (profile AK87)

- 0 - 10 Crumbly completely humified organic material with modern rootlets, partly oxidized.
- 10 - 27 Black, partly oxidised, very well humified reedswamp peat with herbaceous roots.
- 27 - 62 Brown, dry, partly oxidized, very well humified herbaceous peat with *Phragmites* rhizomes.
- 62 - 73 Dark brown humified wet herbaceous peat with *Phragmites* rhizomes.
- 73 - 88 Fresh poorly humified reedswamp peat with wood fragments and some humified herbaceous material
- 88 - 92 Well humified herbaceous peat with *Phragmites* rhizomes.
- 92 - 98 Fresh reedswamp peat with many *Phragmites* rhizomes and *Carex* sedge remains
- 98 - 102 Poorly humified reedswamp peat and organic gyttja with *Phragmites* and *Carex* remains and seeds of *Menyanthes*.
- 102 - 114 Poorly humified reedswamp peat with *Phragmites* and *Carex* remains and seeds of *Menyanthes* and *Potamogeton*. Some organic gyttja and occasional fine sand grains.
- 114 - 127 Olive green to brown organic gyttja with herbaceous roots, *Phragmites* rhizomes and fine sand
- 127 - 128 Organic coarse sand with *Phragmites* rhizomes
- 128 - 132 Coarse sand with *Phragmites* rhizomes
- 132 + Coarse sand with medium gravel

Fig. 7 Flixton Island (profile 1035)

- 0 - 30 Well humified amorphous peat.
- 30 - 49 Medium-fine sand.
- 49 - 51 Very fine organic mud.
- 51+ Stiff clay.

Fig. 8 Flixton Carr (profile VPCG)

- 0 - 9 Confused stratum. Crumbly completely oxidised material with modern rootlets.
- 9 - 18 Carbonised amorphous peat.
- 18 - 36 Very crumbly light coloured humified peat with herbaceous rootlets, slightly oxidized.
- 36 - 38 Very well humified charcoal-rich peat.
- 38 - 51 Mid-brown, slightly clayey, humified herbaceous peat.
- 51 - 54 Organic sand.
- 54 - 57 Coarse sand with small gravel.

|           |                                                                                            |
|-----------|--------------------------------------------------------------------------------------------|
| Fig. 9    | Flixton School Field (profile FS)                                                          |
| 249 - 285 | Dark brown organic gyttja with extensive reed macrofossils and vegetative remains.         |
| 285 - 299 | Dark brown organic gyttja with fewer reed macrofossils and vegetative remains.             |
| 299 - 303 | Light brown to grey silty sand.                                                            |
| 303 - 308 | Brown silty gyttja.                                                                        |
| 308 - 310 | Light brown to grey sandy silt.                                                            |
| 310 - 312 | Unconsolidated grey silty sand.                                                            |
| 312 - 335 | Grey coarse sand with mixed assemblage of gravel, pebbles and chalk fragments.             |
| Fig. 10   | Church Farm Folkton (profile QAA)                                                          |
| 20 - 60   | Brown sedge and <i>Phragmites</i> peat                                                     |
| 60 - 62   | Sandy gravel.                                                                              |
| 62 - 78   | Coarse sand with gravel.                                                                   |
| 78 - 109  | Yellow-orange clay with pebbles.                                                           |
| 109 - 111 | Brown moss peat.                                                                           |
| 111 - 172 | Clayey gyttja.                                                                             |
| 172 - 200 | Brown moss peat with <i>Sphagnum</i> macrofossils.                                         |
| 200 - 240 | Yellow silty marl.                                                                         |
| 240 - 243 | Stiff brown clay.                                                                          |
| Fig. 11   | Barry's Island (profile LAL)                                                               |
| 0 - 108   | Dry, crumbly, oxidised herbaceous peat.                                                    |
| 108 - 233 | Orange-light brown organic gyttja with extensive macrofossil remains of <i>Alnus</i> .     |
| 233 - 243 | Brown organic detrital herbaceous material and gyttja.                                     |
| 243 - 245 | Light grey coarse sand.                                                                    |
| Fig. 12   | Barry's Island (profile LAP)                                                               |
| 0 - 133   | Black, dry, crumbly oxidised peat.                                                         |
| 133 - 167 | Dark brown <i>Phragmites</i> peat with <i>Carex</i> and unidentifiable vegetative remains. |
| 167 - 182 | Orange to black, coarse oxidised sand with peat inclusions.                                |
| 182 - 235 | Dark brown <i>Phragmites</i> peat with sedge and reed vegetative remains.                  |
| 235 - 239 | Orangey-brown <i>Sphagnum</i> peat including <i>Sphagnum</i> spore capsules.               |
| 239 - 254 | Dark brown herbaceous detritus with gyttja and unidentifiable vegetative remains.          |
| 254 - 259 | Dark grey organic silt.                                                                    |
| 259 - 261 | Light grey organic silt.                                                                   |
| 261 - 269 | Brown herbaceous detritus and gyttja.                                                      |
| 269 - 270 | Grey-brown organic sand.                                                                   |
| 270 - 272 | Grey, slightly organic sand.                                                               |

---

Simmons et al. Supplementary Figure S1.

The sediment sequence at No-Name Hill, profile NM, sampled with monolith tins. For stratigraphy see Supplementary Table S1. Photograph GEC 1994. The yellow and white marl deposits resting on sand and clay and underlying reed and woody peat are typical of calcareous sediment deposition in the Lateglacial and early Holocene of the eastern Vale of Pickering.

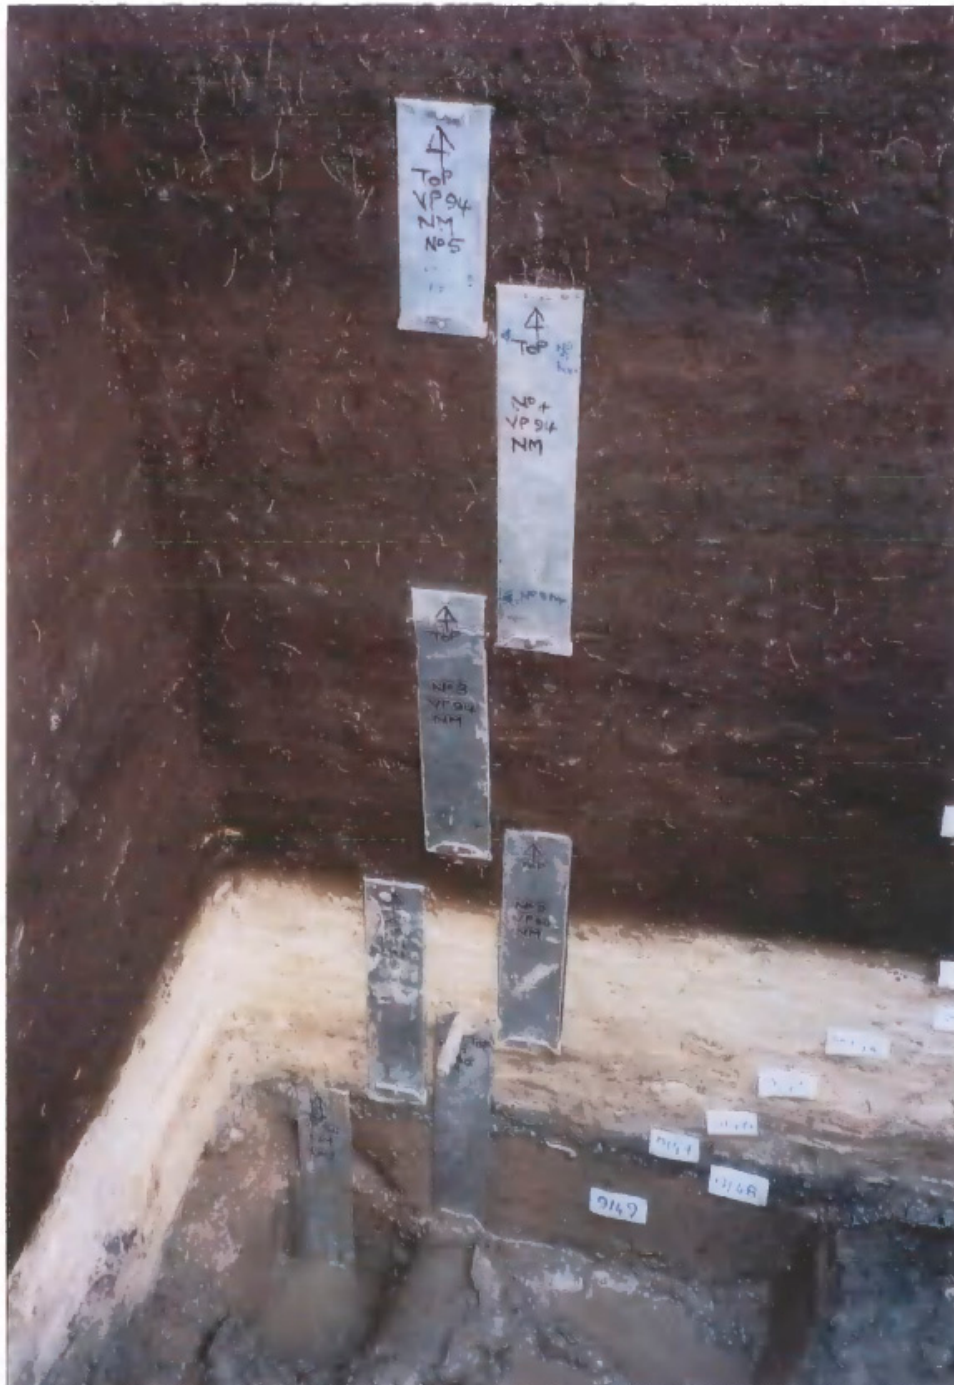

Supplement: s1 [file s1 › quaternary-2035856-supplementary.pdf]
